# Supplementary material for: Detecting Bacterial–Human Lateral Gene Transfer in Chronic Lymphocytic Leukemia
Source: Int J Mol Sci. 2022 Jan 20;23(3):1094. doi: 10.3390/ijms23031094 (PMC8835664; doi:10.3390/ijms23031094)
Supplement: Supplementary file 1 [file ijms-23-01094-s001.zip]

Archive with 8 entries (8 files):
- Figure S1.pdf
- Figure S2.pdf
- Figure S3.pdf
- Figure S4.pdf
- Figure S5.pdf
- supplementary table S1.xlsx
- supplementary table S2.xlsx
- Supporting_figure_legends.pdf
