# Supplementary material for: Detecting Bacterial–Human Lateral Gene Transfer in Chronic Lymphocytic Leukemia
Source: Int J Mol Sci. 2022 Jan 20;23(3):1094. doi: 10.3390/ijms23031094 (PMC8835664; doi:10.3390/ijms23031094)
Supplement: Supplementary file 1 [file ijms-23-01094-s001.zip › supplementary table S2.xlsx]

## Sheet: Tabelle1
bioproject	sample (SRA accession)	cell_type	fastq_reads	LGT_reads	LGT_per_read_percent
PRJEB3366	NA06985	EBV_B_cells	33263834	13	3.90815e-05
PRJEB3366	NA10847	EBV_B_cells	45712286	10	2.1876e-05
PRJEB3366	NA11840	EBV_B_cells	38977955	15	3.84833e-05
PRJEB3366	NA11992	EBV_B_cells	42602140	12	2.81676e-05
PRJEB3366	NA12045	EBV_B_cells	34846392	8	2.29579e-05
PRJEB3366	NA12273	EBV_B_cells	32488663	12	3.6936e-05
PRJEB3366	NA12348	EBV_B_cells	25355167	13	5.12716e-05
PRJEB3366	NA12413	EBV_B_cells	49453727	33	6.6729e-05
PRJEB3366	NA12716	EBV_B_cells	99681708	61	6.11948e-05
PRJEB3366	NA12761	EBV_B_cells	42860092	10	2.33317e-05
PRJEB3366	NA12778	EBV_B_cells	29613662	32	0.000108058
PRJEB3366	NA12812	EBV_B_cells	22323866	4	1.7918e-05
PRJEB3366	NA12829	EBV_B_cells	54304217	13	2.39392e-05
PRJEB3366	NA12843	EBV_B_cells	32333467	16	4.94843e-05
PRJEB3366	NA12874	EBV_B_cells	39639063	10	2.52276e-05
PRJNA731107	SRX10932819	naive B cell	13235942	226	0.00170747
PRJNA731107	SRX10932820	naive B cell	18298149	256	0.00139905
PRJNA731107	SRX10932821	naive B cell	30012002	167	0.000556444
PRJNA731107	SRX10932822	naive B cell	15832852	245	0.00154742
PRJNA762548	SRX12150384	naive B cell	17510241	0	0
PRJNA762548	SRX12150385	naive B cell	20643620	0	0
PRJNA762548	SRX12150386	naive B cell	25717036	0	0
PRJNA762548	SRX12150387	naive B cell	12063925	0	0
PRJNA762548	SRX12150388	naive B cell	14929041	0	0
PRJNA762548	SRX12150390	naive B cell	25536546	0	0
PRJNA626563	SRX8142128	memory B cell	54712801	10067	0.0183997
PRJNA626563	SRX8142129	memory B cell	48877217	6886	0.0140884
PRJNA626563	SRX8142130	memory B cell	51260560	12988	0.0253372
