# Supplementary figures and images for: Detecting Bacterial–Human Lateral Gene Transfer in Chronic Lymphocytic Leukemia
Source: MDPI journal article supplement (doi:10.3390/ijms23031094), 2022-01-20

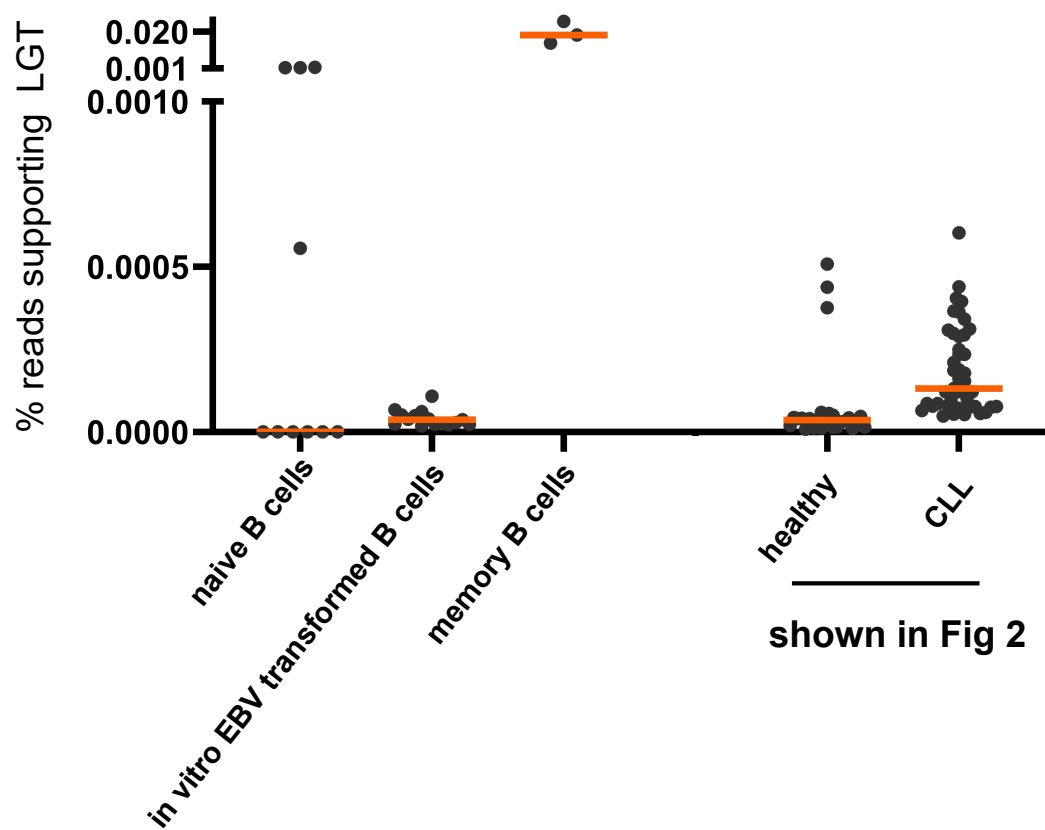

**Supporting Figure S2**

Supplement: s1 [file s1]

A.

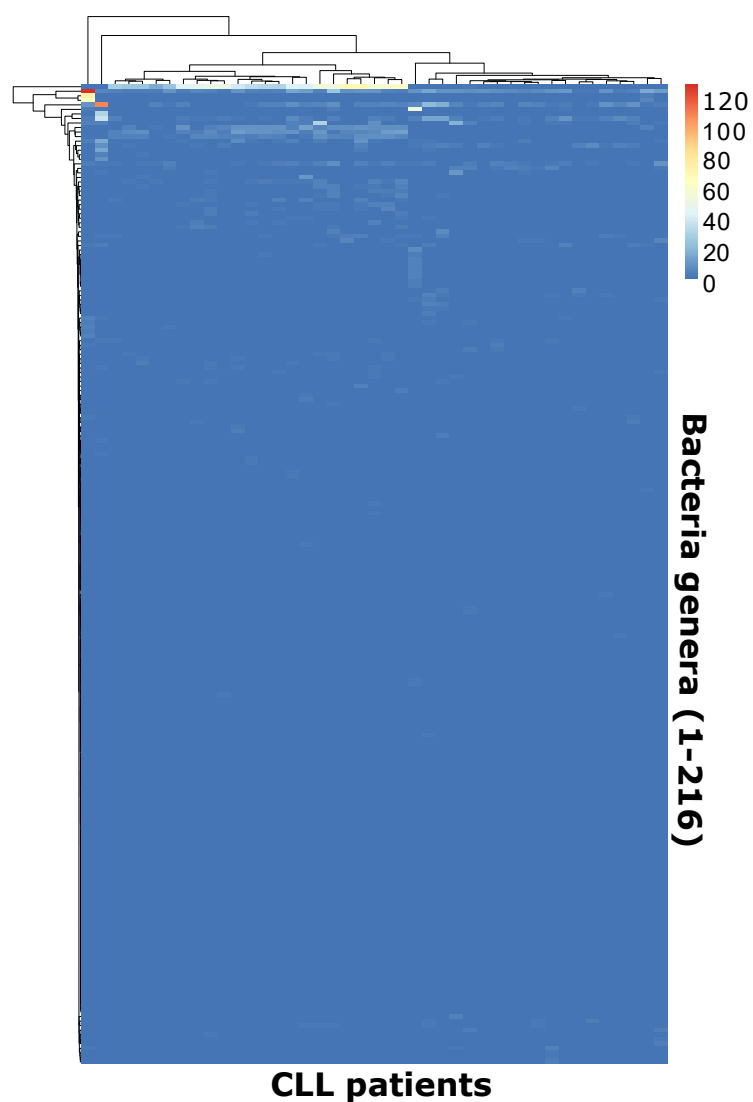

B.

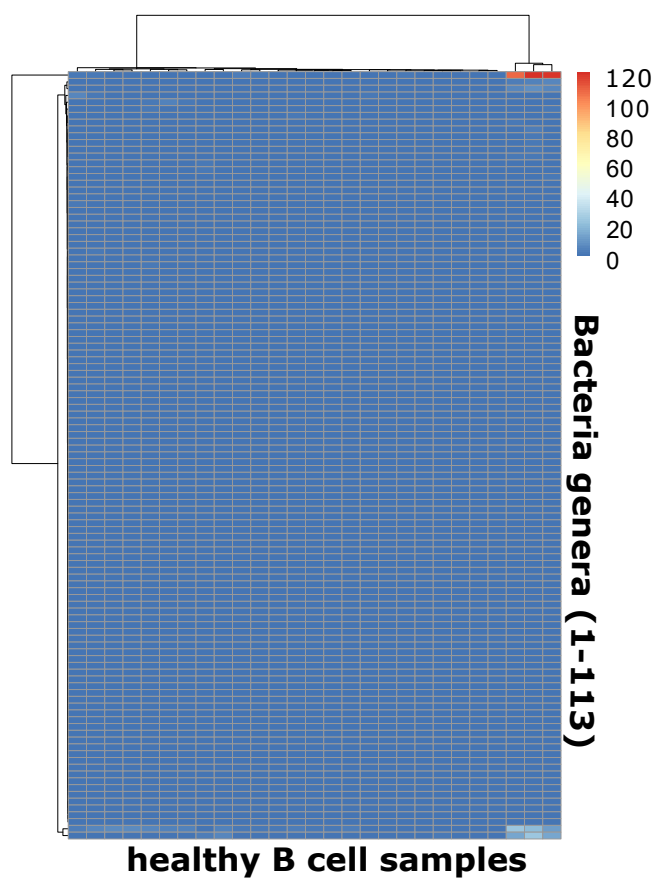

Supporting Figure S3

Supplement: s1 [file s1]

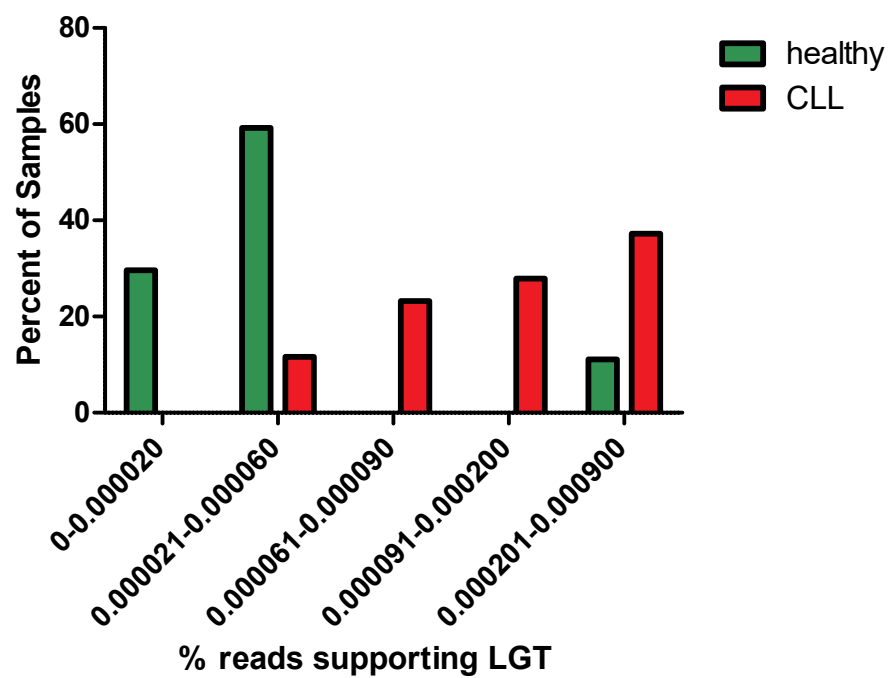

Supporting Figure S1.

Supplement: s1 [file s1]

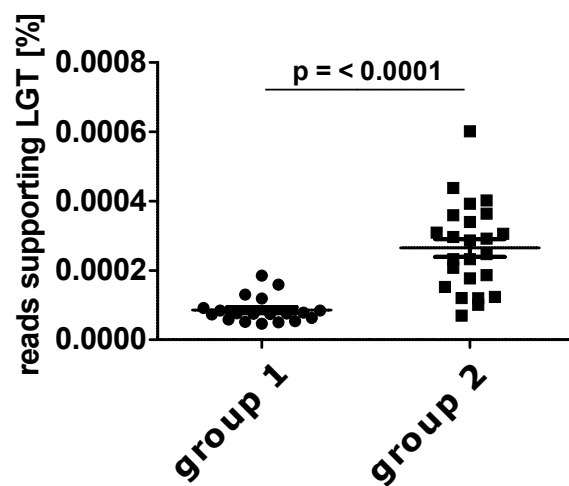

**Supporting Figure S4**

Supplement: s1 [file s1]

A.

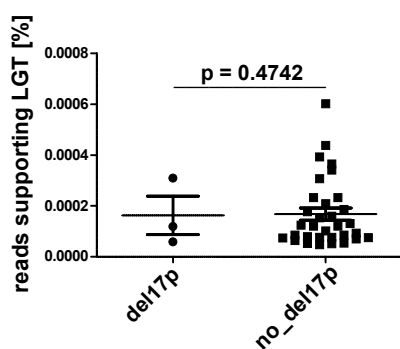

B.

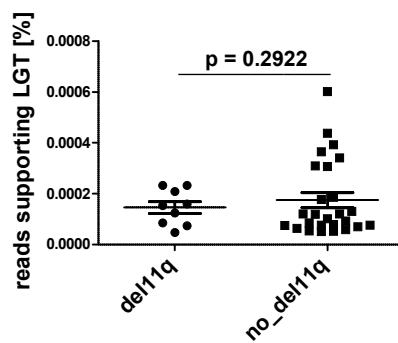

C.

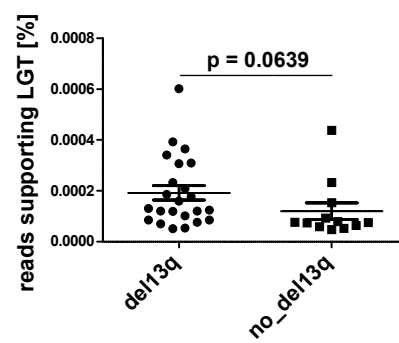

D.

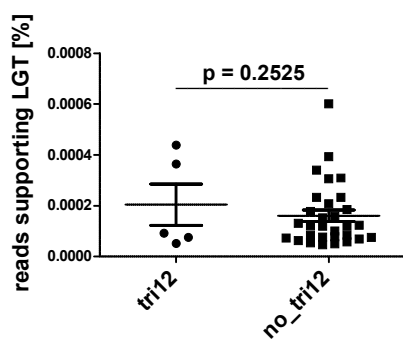

E.

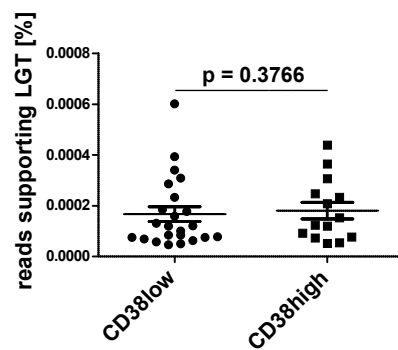

F.

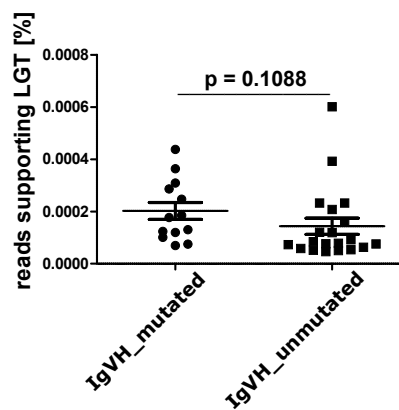

G.

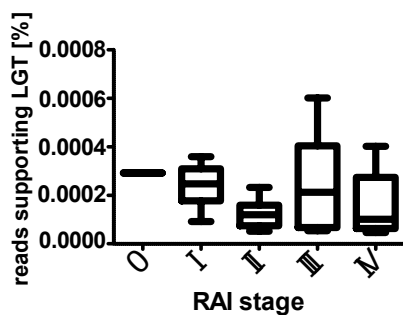

Supporting Figure S5

Supplement: s1 [file s1]
